# Supplementary material for: Estimation of the Chelating Ability of an Extract from Aronia melanocarpa L. Berries and Its Main Polyphenolic Ingredients Towards Ions of Zinc and Copper
Source: PubMed Central journal article supplement (PMC7180758; doi:10.3390/molecules25071507), 2020-03-26
Supplement: molecules-25-01507-s001.pdf [file molecules-25-01507-s001.pdf]

*Supplementary data*

# **Estimation of the Chelating Ability of an Extract from *Aronia melanocarpa* L. Berries and Its Main Polyphenolic Ingredients Towards Ions of Zinc and Copper**

**Sylwia Borowska <sup>1</sup>, Jakub W. Strawa <sup>2</sup>, Michał Tomczyk <sup>2</sup>, and Małgorzata M. Brzoska <sup>1,\*</sup>**

<sup>1</sup> Department of Toxicology, Medical University of Białystok, Adama Mickiewicza 2C, 15-222 Białystok, Poland; sylwiaborowska86@tlen.pl (S.B.); malgorzata.brzoska@umb.edu.pl (M.M.B.)

<sup>2</sup> Department of Pharmacognosy, Medical University of Białystok, Adama Mickiewicza 2A, 15-230 Białystok, Poland; jakub.strawa@umb.edu.pl (J.W.S.); michal.tomczyk@umb.edu.pl (M.T.)

\* Correspondence: malgorzata.brzoska@umb.edu.pl (M.M.B.); Tel.: +48-85-7485604

**Table S1.** The changes in zinc (Zn) and copper (Cu) metabolism after the administration of the 0.1% extract from the berries of *Aronia melanocarpa* L. (AE) to the female Wistar rats for up to 24 months. <sup>1</sup>

| Parameter                                               | 3 months |       | 10 months |       | 17 months |       | 24 months |    |
|---------------------------------------------------------|----------|-------|-----------|-------|-----------|-------|-----------|----|
|                                                         | Zn       | Cu    | Zn        | Cu    | Zn        | Cu    | Zn        | Cu |
| Apparent absorption (%)                                 | NS       | NS    | ↓ 16%     | ↓ 24% | NS        | NS    | NS        | NS |
| Retention in the body (%)                               | NS       | NS    | ↓ 16%     | ↓ 24% | NS        | NS    | NS        | NS |
| Faecal excretion (mg/24 h)                              | NS       | NS    | ↑ 24%     | ↑ 25% | NS        | NS    | NS        | NS |
| Urinary excretion (µg/24 h)                             | NS       | NS    | NS        | NS    | ↑ 72%     | NS    | NS        | NS |
| Concentrations in particular organs, tissues, and serum |          |       |           |       |           |       |           |    |
| Liver (µg/g)                                            | NS       | NS    | NS        | NS    | NS        | NS    | NS        | NS |
| Kidney (µg/g)                                           | NS       | NS    | NS        | NS    | NS        | ↓ 10% | NS        | NS |
| Spleen (µg/g)                                           | NS       | ↓ 11% | NS        | NS    | NS        | NS    | NS        | NS |
| Brain (µg/g)                                            | NS       | NS    | NS        | NS    | NS        | NS    | ↑ 10%     | NS |
| Heart (µg/g)                                            | ↑ 15%    | ↑ 35% | NS        | NS    | NS        | NS    | NS        | NS |
| Stomach (µg/g)                                          | ↓ 9%     | ↓ 21% | NS        | NS    | NS        | NS    | NS        | NS |
| Bone tissue at the femoral diaphysis (µg/g)             | NS       | NS    | NS        | NS    | NS        | NS    | NS        | NS |
| Bone tissue at the femoral distal epiphysis (µg/g)      | NS       | NS    | NS        | NS    | NS        | ↑ 35% | NS        | NS |
| Femoral muscle (µg/g)                                   | NS       | NS    | NS        | NS    | NS        | NS    | ↓ 16%     | NS |
| Duodenum (µg/g)                                         | NS       | NS    | NS        | ↓ 9%  | ↓ 13%     | ↓ 8%  | NS        | NS |
| Serum (µg/mL)                                           | NS       | ↓ 19% | NS        | NS    | NS        | NS    | NS        | NS |

<sup>1</sup> Detailed data have been reported [13]; NS, statistically nonsignificant compared with the control group; ↑, increase; ↓, decrease.

**Table S2.** The effect of divalent ions of zinc ( $Zn^{2+}$ ) and copper ( $Cu^{2+}$ ) at the studied concentrations on wavelength of absorption of the extract from *Aronia melanocarpa* L. berries (AE) at the concentrations of 0.05% and 0.1% and 0.1% ethylenediaminetetraacetic acid (EDTA) at pH 2, 5.5, and 8.

| AE or EDTA<br>(wavelengths) [nm] |     | $Zn^{2+}$ |        |      | $Cu^{2+}$ |         |        |
|----------------------------------|-----|-----------|--------|------|-----------|---------|--------|
|                                  |     | 0.01 mM   | 0.1 mM | 3 mM | 0.01 mM   | 0.05 mM | 0.5 mM |
| <b>pH 2</b>                      |     |           |        |      |           |         |        |
| <b>0.05% AE</b>                  |     |           |        |      |           |         |        |
| UV                               | 283 | 283       | 283    | 283  | 283       | 283     | 283    |
| Vis                              | 527 | 527       | 527    | 527  | 527       | 527     | 527    |
| <b>0.1% AE</b>                   |     |           |        |      |           |         |        |
| UV                               | 283 | 283       | 283    | 283  | 283       | 283     | 283    |
| Vis                              | 527 | 527       | 527    | 527  | 527       | 527     | 527    |
| <b>0.1% EDTA</b>                 |     |           |        |      |           |         |        |
| UV                               | 219 | 261       | 261    | 261  | 261       | 261     | 261    |
| Vis                              | -   | -         | -      | -    | 745       | 745     | 745    |
| <b>pH 5.5</b>                    |     |           |        |      |           |         |        |
| <b>0.05% AE</b>                  |     |           |        |      |           |         |        |
| UV                               | 283 | 283       | 283    | 283  | 283       | 283     | 283    |
| Vis                              | 527 | 538       | 538    | 579  | 583       | 583     | 583    |
| <b>0.1% AE</b>                   |     |           |        |      |           |         |        |
| UV                               | 283 | 283       | 283    | 283  | 283       | 283     | 287    |
| Vis                              | 527 | 538       | 538    | 579  | 527       | 583     | 583    |
| <b>0.1% EDTA</b>                 |     |           |        |      |           |         |        |
| UV                               | 219 | 261       | 261    | 261  | 261       | 261     | 261    |
| Vis                              | -   | -         | -      | -    | 745       | 745     | 745    |
| <b>pH 8</b>                      |     |           |        |      |           |         |        |
| <b>0.05% AE</b>                  |     |           |        |      |           |         |        |
| UV                               | 283 | 283       | 283    | 283  | 283       | 283     | 283    |
| Vis                              | 527 | 527       | 527    | 527  | 527       | 527     | 527    |
| <b>0.1% AE</b>                   |     |           |        |      |           |         |        |
| UV                               | 283 | 283       | 283    | 283  | 283       | 283     | 283    |
| Vis                              | 527 | 527       | 527    | 527  | 527       | 527     | 527    |
| <b>0.1% EDTA</b>                 |     |           |        |      |           |         |        |
| UV                               | 219 | 261       | 261    | 261  | 261       | 261     | 261    |
| Vis                              | -   | -         | -      | -    | 745       | 745     | 745    |

UV, ultraviolet spectroscopy; Vis, visible spectroscopy

**Table S3.** The effect of divalent ions of zinc ( $Zn^{2+}$ ) and copper ( $Cu^{2+}$ ) at the studied concentrations on wavelength of absorption of the main polyphenolic compounds present in the 0.1% extract from *Aronia melanocarpa* L. berries (AE) at pH 5.5.<sup>2</sup>

| Polyphenols<br>(wavelengths) [nm] |     | $Zn^{2+}$   |           |           | $Cu^{2+}$ |           |           |
|-----------------------------------|-----|-------------|-----------|-----------|-----------|-----------|-----------|
|                                   |     | 0.01 mM     | 0.1 mM    | 3 mM      | 0.01 mM   | 0.05 mM   | 0.5 mM    |
| <b>0.008% C3G</b>                 |     |             |           |           |           |           |           |
| UV                                | 282 | 281         | 281       | 281       | 282       | 282       | u.v.      |
| Vis                               | 528 | 538 (+10) * | 538 (+10) | 585 (+57) | 585 (+57) | 585 (+57) | 585 (+57) |
| <b>0.002% Q</b>                   |     |             |           |           |           |           |           |
| UV                                | 255 | 255         | 255       | 255       | 255       | 255       | 255       |
| Vis                               | 355 | 378 (+23)   | 379 (+24) | 380 (+25) | 378 (+23) | 378 (+23) | 378 (+23) |
| <b>0.002% K</b>                   |     |             |           |           |           |           |           |
| UV                                | 265 | 264         | 264       | 265       | 265       | 256       | 256       |
| Vis                               | 340 | 349 (+9)    | 350 (+10) | 350 (+10) | 340       | 339       | 339       |
| <b>0.007% CA</b>                  |     |             |           |           |           |           |           |
| UV                                | 219 | 218         | 218       | 218       | 219       | 219       | 219       |
| Vis                               | 336 | 329         | 329       | 329       | 328       | 326       | 328       |
| <b>0.007% NCA</b>                 |     |             |           |           |           |           |           |
| UV                                | 219 | 218         | 218       | 218       | 219       | 219       | 219       |
| Vis                               | 336 | 329         | 329       | 329       | 328       | 328       | 328       |
| <b>0.013% (+)-catechin</b>        |     |             |           |           |           |           |           |
| UV                                | 282 | 282         | 282       | 282       | 282       | 282       | 282       |
| Vis                               | 387 | 387         | 387       | 387       | 387       | 387       | 387       |
| <b>0.013% (-)-epicatechin</b>     |     |             |           |           |           |           |           |
| UV                                | 282 | 282         | 282       | 282       | 282       | 282       | 282       |
| Vis                               | 390 | 390         | 390       | 390       | 390       | 390       | 390       |

<sup>2</sup>The influence of  $Zn^{2+}$  and  $Cu^{2+}$  at the studied concentrations on wavelength of absorption of particular polyphenolic compounds present in the 0.1% AE at pH 2 and 8 (lack of complexation) has been presented in Table S4 and Table S5, respectively.

UV, ultraviolet spectroscopy; Vis, visible spectroscopy; C3G, cyanidin 3-*O*- $\beta$ -galactoside; Q, quercetin; K, kaempferol; CA, chlorogenic acid; NCA, neochlorogenic acid; u.v., unreadable value.

\* Values in parentheses represent the shift of the maximum absorption noted after the addition of the solutions containing  $Zn^{2+}$  or  $Cu^{2+}$  to the solutions of polyphenolic compounds.

**Table S4.** The effect of divalent ions of zinc ( $Zn^{2+}$ ) and copper ( $Cu^{2+}$ ) at the studied concentrations on wavelength of absorption of polyphenolic compounds present in the 0.1% extract from *Aronia melanocarpa* L. berries (AE) at pH 2.

| Polyphenols<br>(wavelengths) [nm] |     | $Zn^{2+}$ |        |      | $Cu^{2+}$ |         |        |
|-----------------------------------|-----|-----------|--------|------|-----------|---------|--------|
|                                   |     | 0.01 mM   | 0.1 mM | 3 mM | 0.01 mM   | 0.05 mM | 0.5 mM |
| <b>0.008% C3G</b>                 |     |           |        |      |           |         |        |
| UV                                | 282 | 282       | 282    | 282  | 282       | 282     | 282    |
| Vis                               | 528 | 528       | 528    | 528  | 528       | 528     | 528    |
| <b>0.002% Q</b>                   |     |           |        |      |           |         |        |
| UV                                | 255 | 255       | 255    | 255  | 255       | 255     | 255    |
| Vis                               | 349 | 349       | 349    | 349  | 349       | 349     | 349    |
| <b>0.002% K</b>                   |     |           |        |      |           |         |        |
| UV                                | 265 | 265       | 265    | 265  | 265       | 265     | 265    |
| Vis                               | 372 | 372       | 372    | 372  | 372       | 372     | 372    |
| <b>0.007% CA</b>                  |     |           |        |      |           |         |        |
| UV                                | 219 | 219       | 219    | 219  | 219       | 219     | 219    |
| Vis                               | 336 | 329       | 329    | 329  | 328       | 326     | 328    |
| <b>0.007% NCA</b>                 |     |           |        |      |           |         |        |
| UV                                | 219 | 218       | 218    | 218  | 219       | 219     | 219    |
| Vis                               | 336 | 329       | 329    | 329  | 328       | 328     | 328    |
| <b>0.013% (+)-catechin</b>        |     |           |        |      |           |         |        |
| UV                                | 282 | 282       | 282    | 282  | 282       | 282     | 282    |
| Vis                               | 387 | 387       | 387    | 387  | 387       | 387     | 387    |
| <b>0.013% (-)-epicatechin</b>     |     |           |        |      |           |         |        |
| UV                                | 282 | 282       | 282    | 282  | 282       | 282     | 282    |
| Vis                               | 390 | 390       | 390    | 390  | 390       | 390     | 390    |

UV, ultraviolet spectroscopy; Vis, visible spectroscopy; C3G, cyanidin 3-*O*- $\beta$ -galactoside; Q, quercetin; K, kaempferol; CA, chlorogenic acid; NCA, neochlorogenic acid.

**Table S5.** The effect of divalent ions of zinc (Zn<sup>2+</sup>) and copper (Cu<sup>2+</sup>) at the studied concentrations on wavelength of absorption of polyphenolic compounds present in the 0.1% extract from *Aronia melanocarpa* L. berries (AE) at pH 8.

| Polyphenols<br>(wavelengths) [nm] | Zn <sup>2+</sup> |        |      | Cu <sup>2+</sup> |         |        |
|-----------------------------------|------------------|--------|------|------------------|---------|--------|
|                                   | 0.01 mM          | 0.1 mM | 3 mM | 0.01 mM          | 0.05 mM | 0.5 mM |
| <b>0.008% C3G</b>                 |                  |        |      |                  |         |        |
| UV                                | 282              | 282    | 282  | 282              | 282     | 282    |
| Vis                               | 528              | 528    | 528  | 528              | 528     | 528    |
| <b>0.002% Q</b>                   |                  |        |      |                  |         |        |
| UV                                | 255              | 255    | 255  | 255              | 255     | 255    |
| Vis                               | 349              | 349    | 349  | 349              | 349     | 349    |
| <b>0.002% K</b>                   |                  |        |      |                  |         |        |
| UV                                | 265              | 265    | 265  | 265              | 265     | 265    |
| Vis                               | 372              | 372    | 372  | 372              | 372     | 372    |
| <b>0.007% CA</b>                  |                  |        |      |                  |         |        |
| UV                                | 219              | 219    | 219  | 219              | 219     | 219    |
| Vis                               | 336              | 329    | 329  | 329              | 328     | 326    |
| <b>0.007% NCA</b>                 |                  |        |      |                  |         |        |
| UV                                | 219              | 218    | 218  | 218              | 219     | 219    |
| Vis                               | 336              | 329    | 329  | 329              | 328     | 328    |
| <b>0.013% (+)-catechin</b>        |                  |        |      |                  |         |        |
| UV                                | 282              | 282    | 282  | 282              | 282     | 282    |
| Vis                               | 387              | 387    | 387  | 387              | 387     | 387    |
| <b>0.013% (-)-epicatechin</b>     |                  |        |      |                  |         |        |
| UV                                | 282              | 282    | 282  | 282              | 282     | 282    |
| Vis                               | 390              | 390    | 390  | 390              | 390     | 390    |

UV, ultraviolet spectroscopy; Vis, visible spectroscopy; C3G, cyanidin 3-*O*- $\beta$ -galactoside; Q, quercetin; K, kaempferol; CA, chlorogenic acid; NCA, neochlorogenic acid.

**Table S6.** The effect of divalent ions of zinc ( $Zn^{2+}$ ) and copper ( $Cu^{2+}$ ) at the studied concentrations on wavelength of absorption of ethylenediaminetetraacetic acid (EDTA) at pH 5.5.

| EDTA               |     | $Zn^{2+}$ |        |      | $Cu^{2+}$ |         |        |
|--------------------|-----|-----------|--------|------|-----------|---------|--------|
| (wavelengths) [nm] |     | 0.01 mM   | 0.1 mM | 3 mM | 0.01 mM   | 0.05 mM | 0.5 mM |
| <b>0.05% EDTA</b>  |     |           |        |      |           |         |        |
| UV                 | 219 | 261       | 261    | 261  | -         | -       | -      |
| Vis                | 356 | -         | -      | -    | 745       | 745     | 745    |
| <b>0.013% EDTA</b> |     |           |        |      |           |         |        |
| UV                 | 219 | 261       | 261    | 261  | -         | -       | -      |
| Vis                | 356 | -         | -      | -    | 745       | 745     | 745    |
| <b>0.008% EDTA</b> |     |           |        |      |           |         |        |
| UV                 | 219 | 261       | 261    | 261  | -         | -       | -      |
| Vis                | 356 | -         | -      | -    | 745       | 745     | 745    |
| <b>0.007% EDTA</b> |     |           |        |      |           |         |        |
| UV                 | 219 | 265       | 265    | 265  | -         | -       | -      |
| Vis                | 356 | -         | -      | -    | 745       | 745     | 745    |
| <b>0.002% EDTA</b> |     |           |        |      |           |         |        |
| UV                 | 219 | 265       | 265    | 265  | -         | -       | -      |
| Vis                | 356 | -         | -      | -    | 745       | 745     | 745    |

UV, ultraviolet spectroscopy; Vis, visible spectroscopy

## **Supplementary Material—Assessment of the stability of the extract from the berries of *Aronia melanocarpa* L. (AE)**

### **Methodology**

The assessment of the stability of the AE was carried out using a Specord 200 spectrophotometer (Analytik Jena, Germany). Ultraviolet (UV) spectra within the range of 190–1100 nm were recorded. Spectrum correction was performed for methanol:water solutions (7:3, v/v) at pH values of 2, 5.5, and 8. The degree of acidification was obtained by adding the appropriate amount of HCl and NaOH solution. A 0.1% AE solution with three pH values was used to assess stability. Measurements were made immediately after preparation (1 h) and 24, 48, and 72 h after preparation of the solution.

### **Results and Discussion**

The UV spectra of 0.1% AE at pH 2, 5.5, and 8 after preparation (1 h) and after 24, 48, and 72 h, presented in Figures S1–S3, show that this solution was stable at all pH during the first 24 h after preparation.

The critical region of the UV spectrum of the analyzed extract falls within the 340–640 nm wavelength range. The deflection range around 400 nm is a typical area for the band I spectrum of flavonoid compounds and band II for anthocyanins. The range above 400 nm is the band of anthocyanins, which corresponds to the spectrum of the reference substance used in the experiment—cyanidin 3-*O*- $\beta$ -galactoside (C3G). The measurements carried out indicate a small variability of the spectrum in an acidic environment and a gradual decrease in its intensity with an increase in pH and time since preparation of the solution. This result has its justification in the chemical structure of anthocyanins and their transformations in an alkaline environment.



## 0.1% AE stability at pH 2

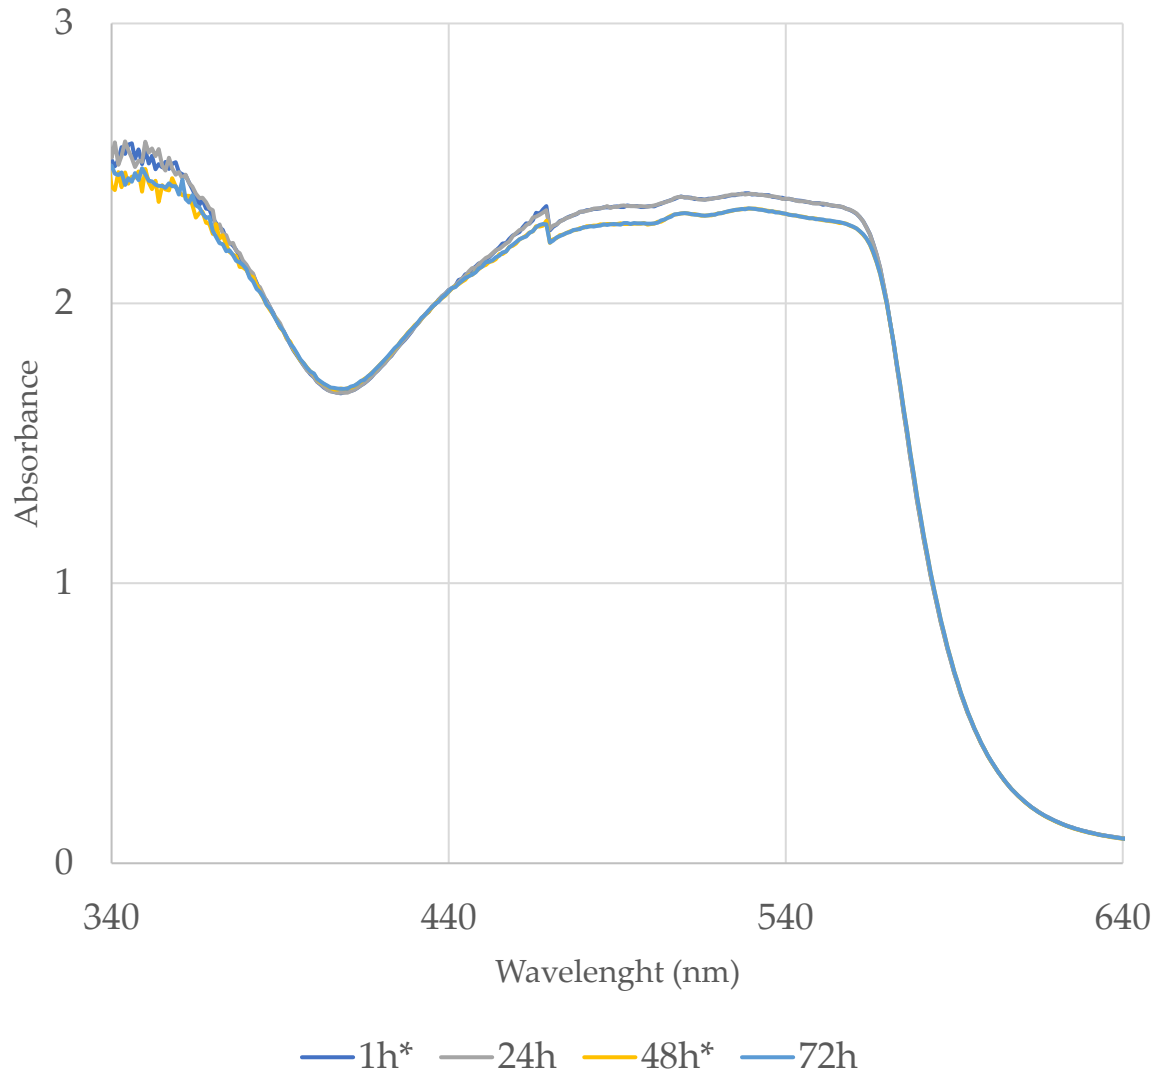

\* spectrum recorded after 24 h and 72 h overlapping spectrum recorded after preparation and after 48h, respectively.

**Figure S1.** Ultraviolet (UV) spectrum of 0.1% extract from the berries of *Aronia melanocarpa* L. (AE) at pH 2 after preparation (1 h) and after 24, 48, and 72 h.

## 0.1% AE stability at pH 5.5

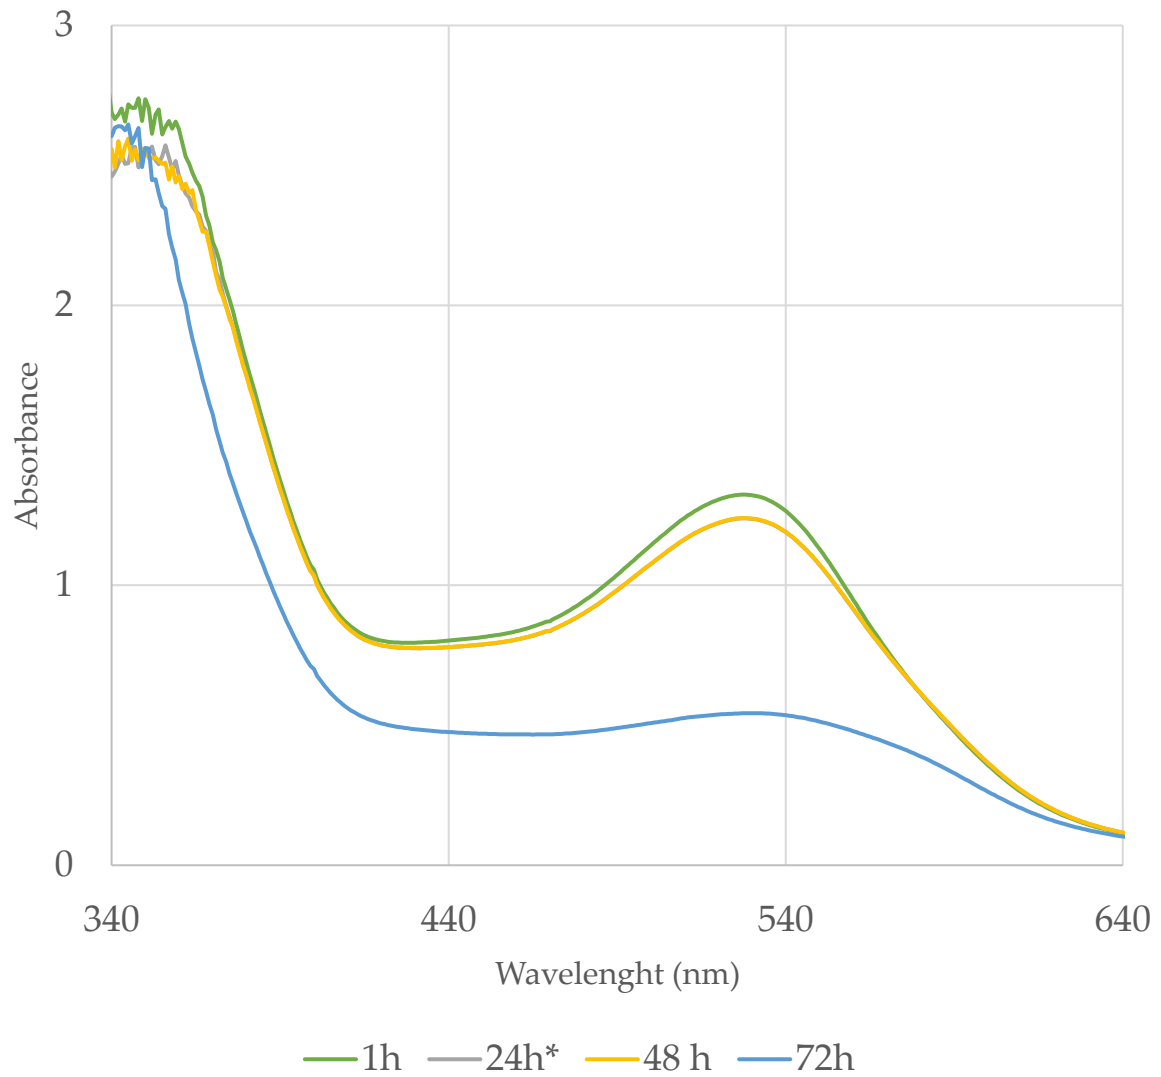

\* spectrum recorded after preparation overlapping spectrum after 24h.

**Figure S2.** Ultraviolet (UV) spectrum of 0.05% extract from the berries of *Aronia melanocarpa* L. (AE) at pH 5.5 after preparation (1 h) and after 24, 48, and 72 h.

## 0.1% AE stability at pH 8

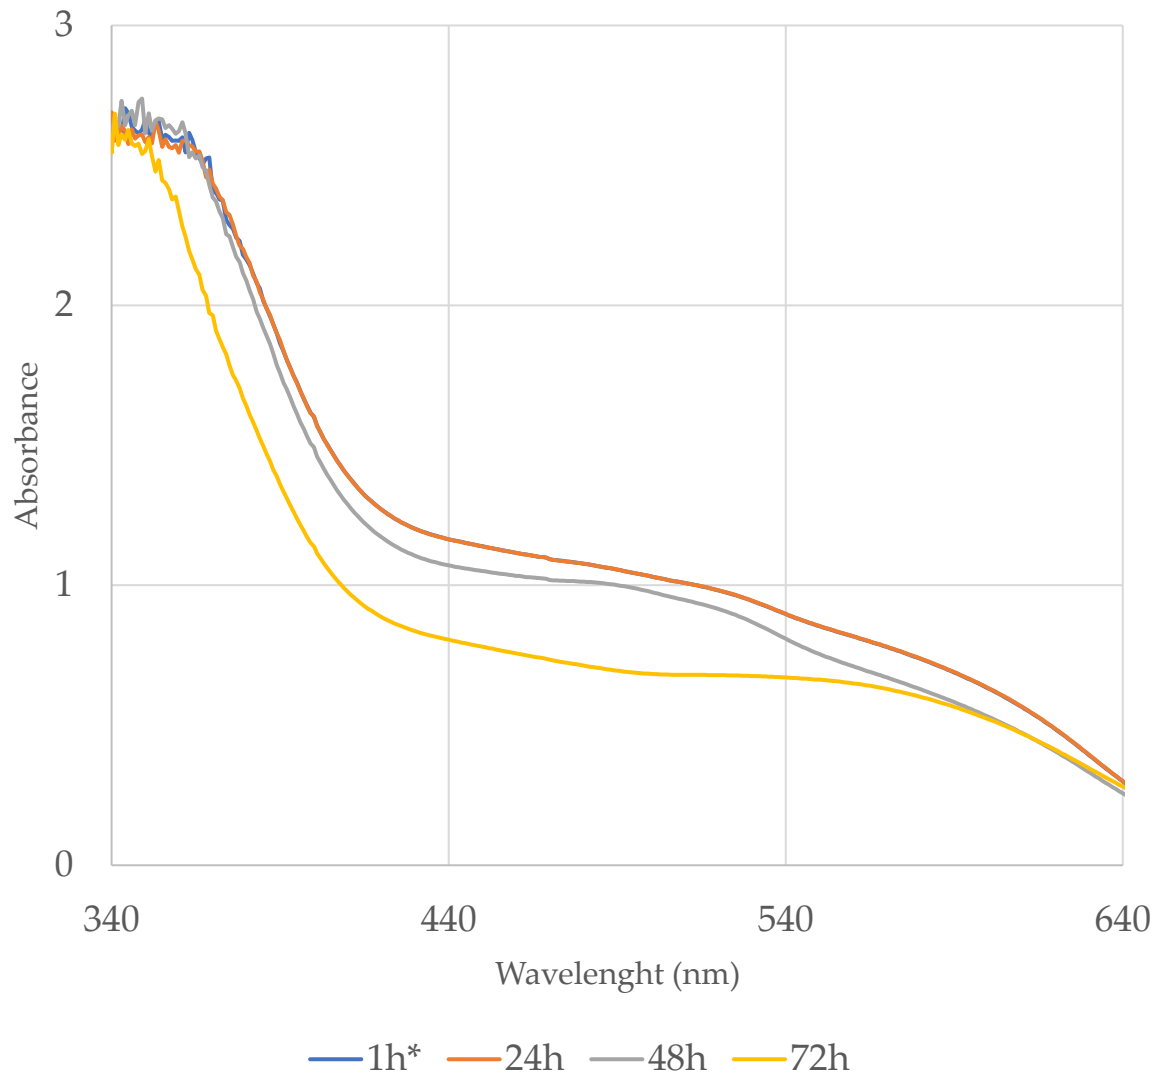

\* spectrum recorded after 24 h overlapping spectrum recorded after preparation.

**Figure S3.** Ultraviolet (UV) spectrum of 0.05% extract from the berries of *Aronia melanocarpa* L. (AE) at pH 8 after preparation (1 h) and after 24, 48, and 72 h.
